# Supplementary material for: Characterization of the mechanical properties of cancer cells in 3D matrices in response to collagen concentration and cytoskeletal inhibitors
Source: Royal Society of Chemistry journal article supplement (doi:10.1039/c8ib00044a), 2018-03-27
Supplement: c8ib00044a1.pdf [file c8ib00044a1.pdf]

## Supplementary Material

**Supplemental Table S1. Shear modulus values of collagen gels.**

|                    | <b>1.0 mg/mL</b> | <b>2.0 mg/mL</b> | <b>3.0 mg/mL</b> | <b>4.0 mg/mL</b> |
|--------------------|------------------|------------------|------------------|------------------|
| Average            | 1.639466667      | 21.823333333     | 43.765566667     | 80.026133333     |
| Standard deviation | 0.040002667      | 1.803642765      | 1.763220197      | 5.638667171      |

Supplemental Figures

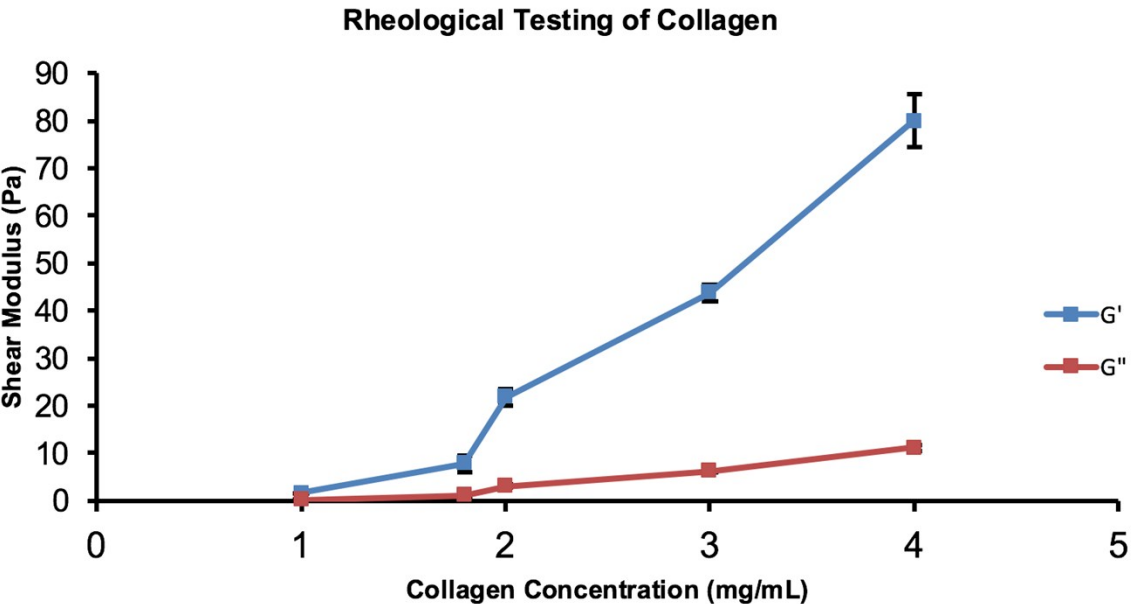

**Supplemental Figure S1. Mechanical properties of collagen gels.** Collagen gels were measured using a rheometer with a 40 mm aluminum cone (2 degrees) geometry. The angular frequency was 1 Hz and measurements were taken every 1 minute for a duration of 1 hour. The G' and G'' values were taken as an average of 10 data points between 50 minute and 60 minutes.

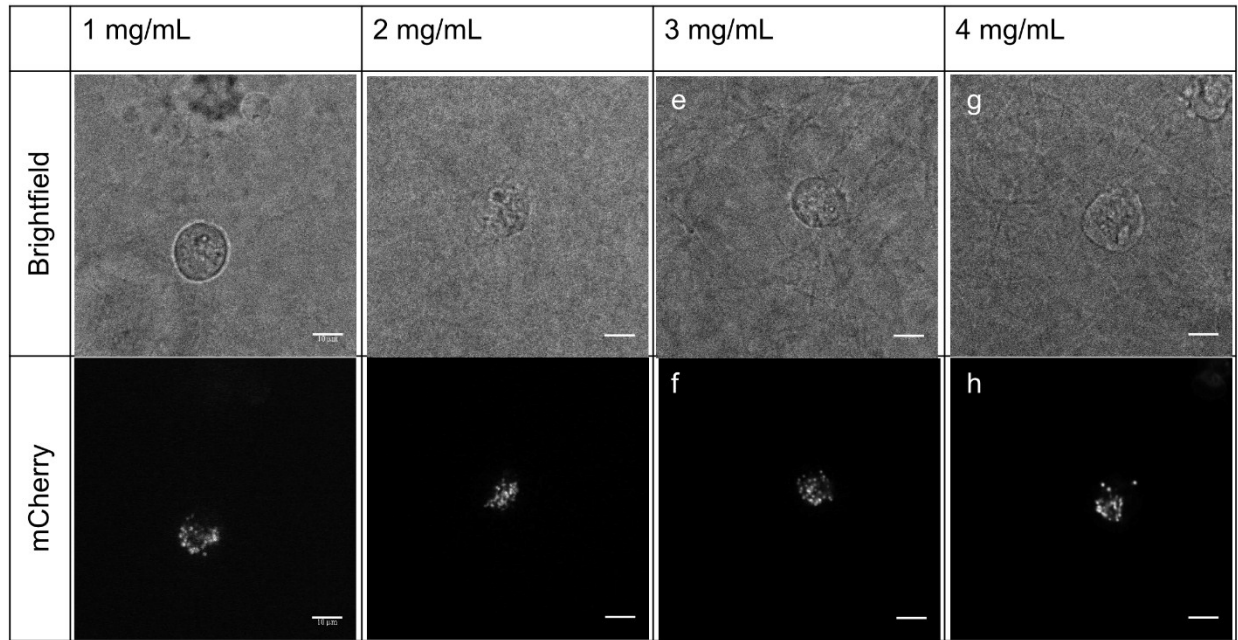

**Supplemental Figure S2. Images of untreated cells and corresponding mitochondria in 1-4 mg/mL collagen.** a-b) Cell in 1 mg/mL collagen with images of brightfield and mCherry c-d) Cell in 2 mg/mL collagen with images of brightfield and mCherry e-f) Cell in 3 mg/mL collagen with images of brightfield and mCherry g-h) Cell in 4 mg/mL collagen with images of brightfield and mCherry. Scale bar is 10  $\mu$ m.

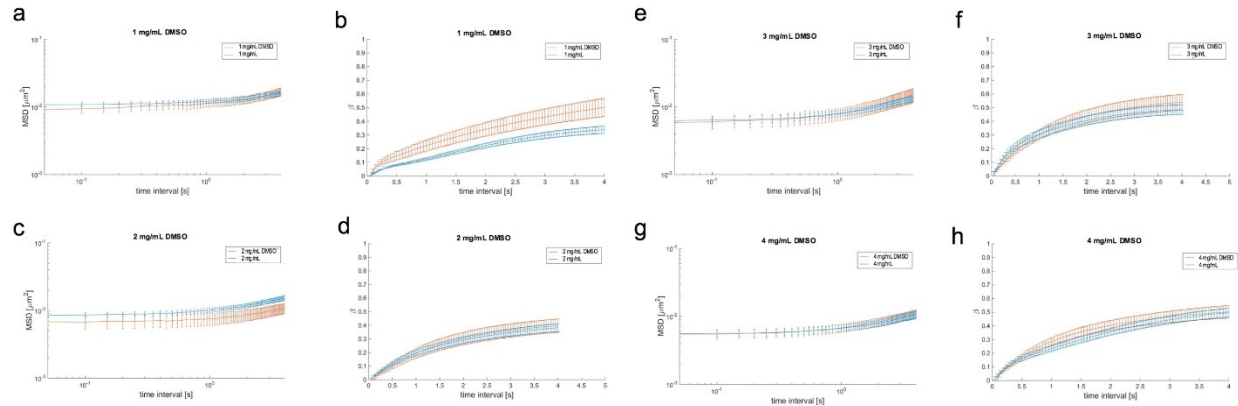

**Supplemental Figure S3. DMSO treatment of cells.** a) MSD curves of MDA-MB-231 cells treated with DMSO and control cells embedded in 1 mg/mL collagen. b)  $\beta$  curves of of MDA-MB-231 cells treated with DMSO and control cells embedded in 1 mg/mL collagen. c) MSD curves of MDA-MB-231 cells treated with DMSO and control cells embedded in 2 mg/mL collagen. d)  $\beta$  curves of of MDA-MB-231 cells treated with DMSO and control cells embedded in 2 mg/mL collagen e) MSD curves of MDA-MB-231 cells treated with DMSO and control cells embedded in 3 mg/mL collagen. f)  $\beta$  curves of of MDA-MB-231 cells treated with DMSO and control cells embedded in 3 mg/mL collagen g) MSD curves of MDA-MB-231 cells treated with DMSO and control cells embedded in 4 mg/mL collagen. h)  $\beta$  curves of of MDA-MB-231 cells treated with DMSO and control cells embedded in 4 mg/mL collagen

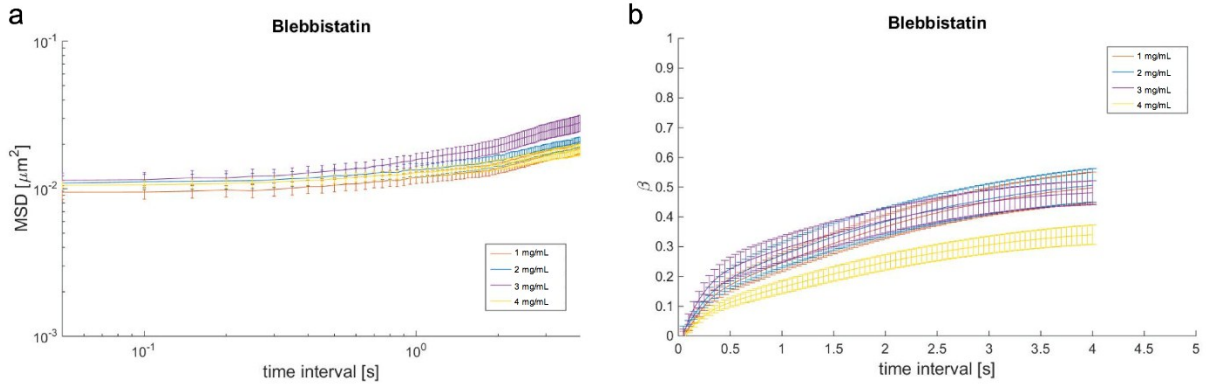

**Supplemental Figure S4. Blebbistatin treated cells.** Cells were incubated with blebbistatin (50  $\mu\text{M}$ ) for 2 hours in 1-4 mg/mL collagen gels. a) MSD curves of MDA-MB-231 cells treated with blebbistatin embedded in 1-4 mg/mL collagen. b)  $\beta$  curves of of MDA-MB-231 cells treated with blebbistatin embedded in 1-4 mg/mL collagen

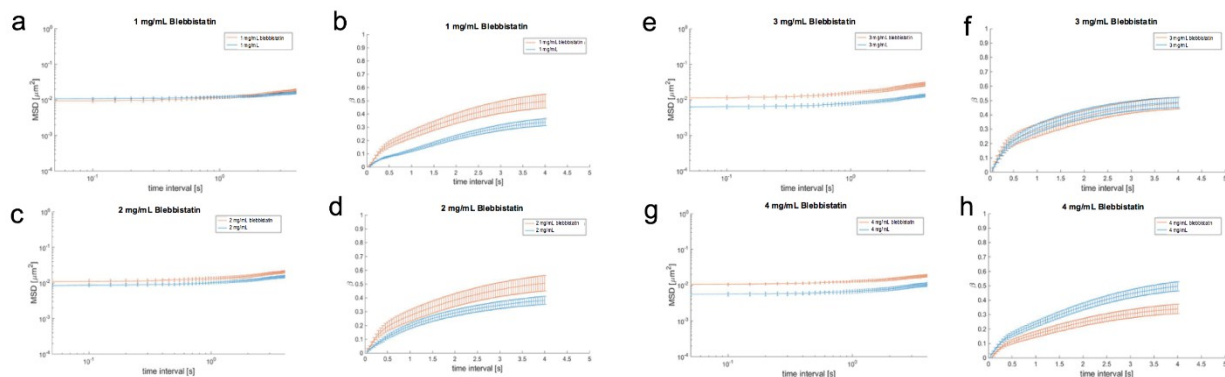

**Supplemental Figure S5. Comparison of Blebbistatin treated cells with control cells.** a) MSD curves of MDA-MB-231 cells treated with blebbistatin and control cells embedded in 1 mg/mL collagen. b)  $\beta$  curves of of MDA-MB-231 cells treated with blebbistatin and control cells embedded in 1 mg/mL collagen. c) MSD curves of MDA-MB-231 cells treated with blebbistatin and control cells embedded in 2 mg/mL collagen. d)  $\beta$  curves of of MDA-MB-231 cells treated with blebbistatin and control cells embedded in 2 mg/mL collagen e) MSD curves of MDA-MB-231 cells treated with blebbistatin and control cells embedded in 3 mg/mL collagen. f)  $\beta$  curves of of MDA-MB-231 cells treated with blebbistatin and control cells embedded in 3 mg/mL collagen g) MSD curves of MDA-MB-231 cells treated with blebbistatin and control cells embedded in 4 mg/mL collagen. h)  $\beta$  curves of of MDA-MB-231 cells treated with blebbistatin and control cells embedded in 4 mg/mL collagen

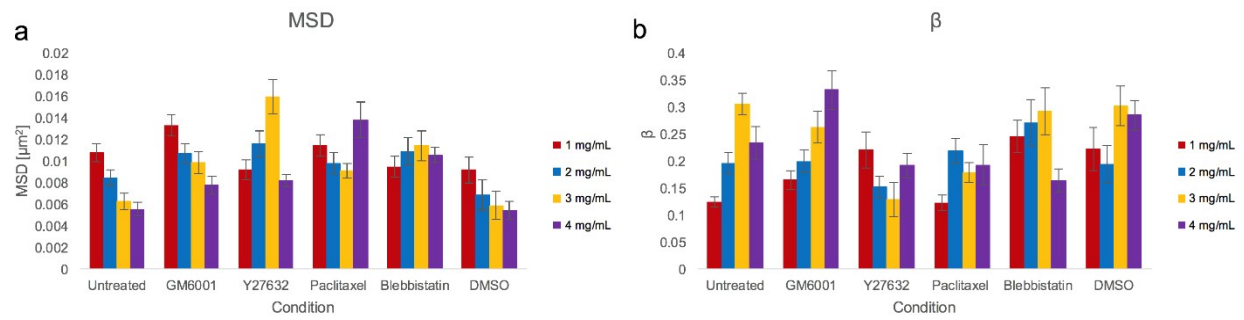

**Supplemental Figure S6. Comparison of untreated with drug treated cells.** a) Comparison of MSDs at  $t = 50$  ms of untreated and drug treated cells in 1-4 mg/mL collagen. b) Comparison of  $\beta$  's at  $t = 1$  s of untreated and drug treated cells in 1-4 mg/mL collagen. Blebbistatin and DMSO treated conditions are also shown for comparison. Error bars are s.e.m. \* indicates  $p < 0.05$ .

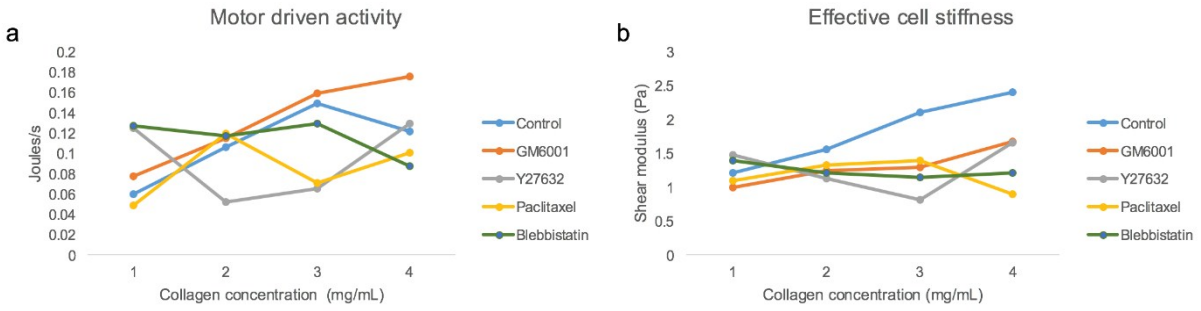

**Supplemental Figure S7. Relationship between collagen concentration and effective cell stiffness.** a) Power output generated by molecular motors of cells embedded in 1-4 mg/mL collagen b) Shear modulus of cells embedded in 1-4 mg/mL collagen. Assumed mitochondria with radius  $r_{\text{tracer}} = 70 \text{ nm}$ .



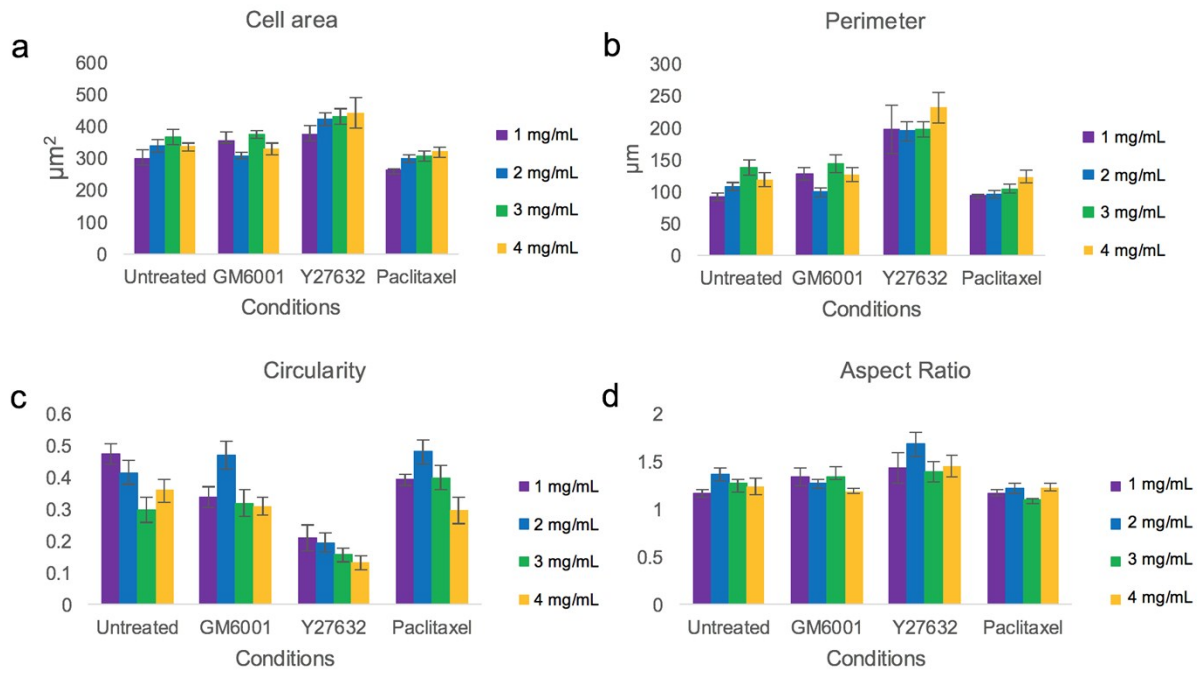

**Supplemental Figure S8. Cell morphology analysis of untreated, GM6001, Y27632, and Paclitaxel treated cells in 1-4mg/mL collagen.** a) Cell area b) Cell perimeter c) Aspect ratio, and d) Circularity of phalloidin stained cells. Number of cells for untreated (1 mg/mL n=15, 2 mg/mL n=21, 3 mg/mL=15, 4 mg/mL n=15), GM6001 treated cells (1 mg/mL n=14, 2 mg/mL n=22, 3 mg/mL n=15, 4 mg/mL n=15), Y27632 treated cells (1 mg/mL n=15, 2 mg/mL n=22, 3 mg/mL n=15, 4 mg/mL n=14), and Paclitaxel treated cells (1 mg/mL n=15, 2 mg/mL n=23, 3 mg/mL n=15, 4 mg/mL n=15). Error bars are s.e.m.
